# Supplementary material for: Facile preparation of BiOI/T-ZnOw p–n heterojunction photocatalysts with enhanced removal efficiency for rhodamine B and oxytetracycline
Source: Royal Society of Chemistry journal article supplement (doi:10.1039/d2nj01609e), 2022-01-01
Supplement: d2nj01609e1.pdf [file d2nj01609e1.pdf]

## Supporting information

### Facile preparation of BiOI/T-ZnOw p–n heterojunction photocatalysts with enhanced removal efficiency for rhodamine B and oxytetracycline

Jianke Tang,<sup>a, b</sup> Yanfeng Xue,<sup>a</sup> Chunlei Ma,<sup>a</sup> Shengjian Zhang,<sup>a, b</sup> and Qiaoling Li<sup>\*c</sup>

<sup>a</sup> Department of Chemistry and Chemical Engineering, Taiyuan Institute of Technology, Taiyuan, 030008, PR China

<sup>b</sup> School of Chemical Engineering and Technology, North University of China, Taiyuan, 030051, PR China

<sup>c</sup> School of Science, North University of China, Taiyuan, 030051, PR China. E-mail: qiaolingl@163.com

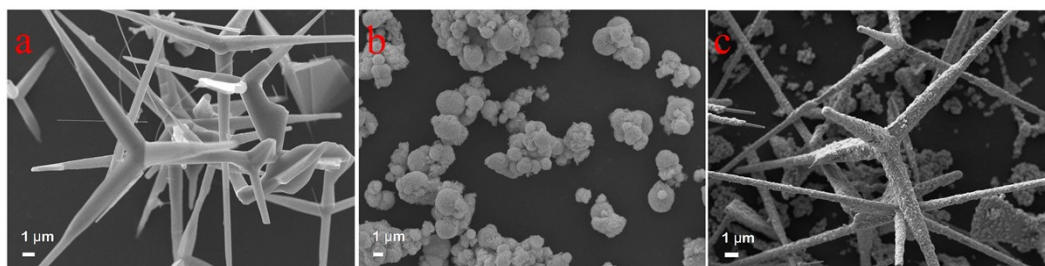

**Figure S1** Low magnification SEM images of (a) T-ZnOw, (b) BiOI, and (c) BZ-10.

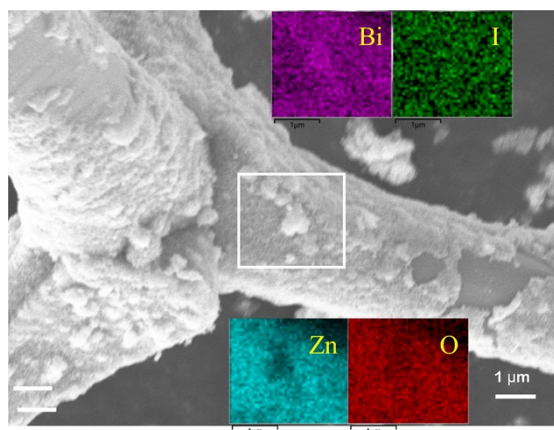

**Figure S2** EDS elemental mapping image of the BZ-10 composite.

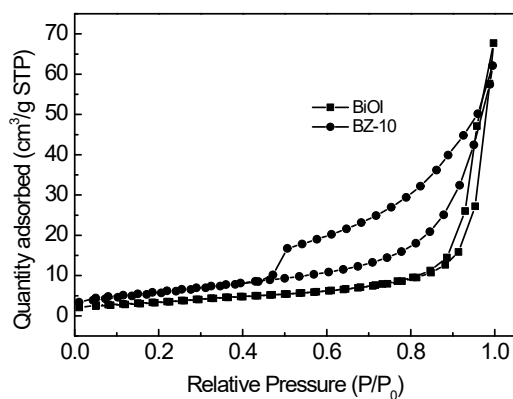

**Figure S3** N<sub>2</sub> adsorption–desorption isotherms of BiOI and BZ-10.

**Table S1** BET surface areas ( $S_{\text{BET}}$ ) and pore volumes of T-ZnOw, BiOI, and BZ-10.

| Samples | $S_{\text{BET}}$ ( $\text{m}^2 \text{g}^{-1}$ ) | Pore volume ( $\text{cm}^3 \text{g}^{-1}$ ) |
|---------|-------------------------------------------------|---------------------------------------------|
| T-ZnOw  | 0.34                                            | 0.000124                                    |
| BiOI    | 12.80                                           | 0.039188                                    |
| BZ-10   | 22.16                                           | 0.065478                                    |

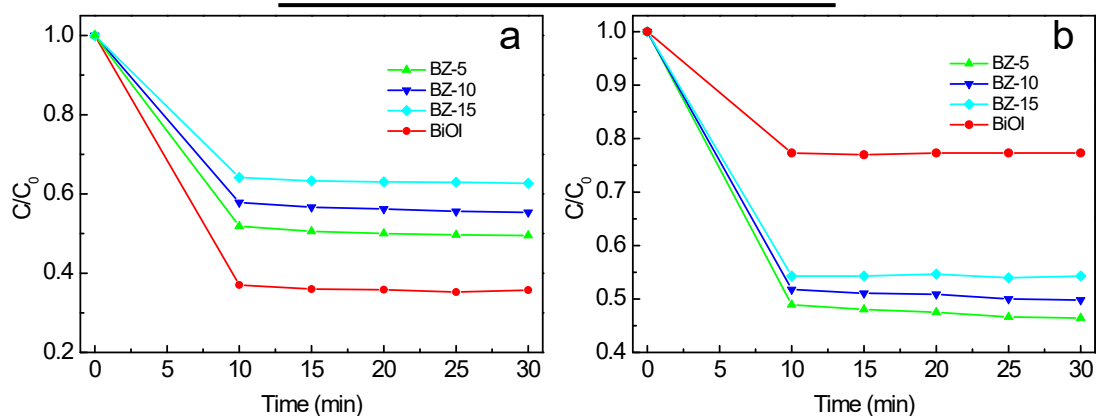

**Figure S4** Adsorption behaviors of the BiOI, BZ-5, BZ-10, and BZ-15 photocatalysts for (a) RhB and (b) OTC.

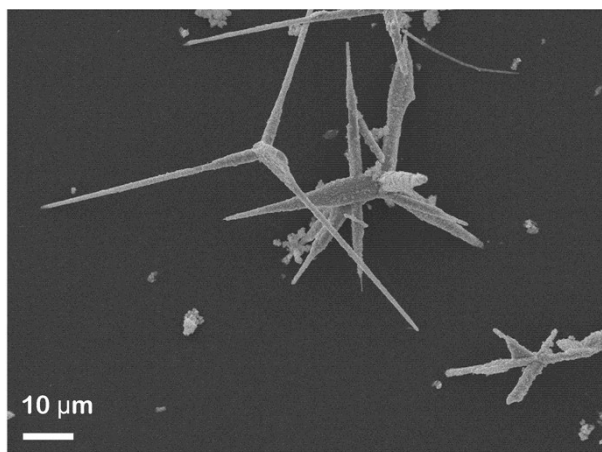

**Figure S5** SEM image of the used BZ-10 photocatalyst.
